# Supplementary material
Source: PubMed Central journal article supplement (PMC6427232)
Supplement: 141245_1_supp_263414_pkyq9t.pdf [file 141245_1_supp_263414_pkyq9t.pdf]

**Phosphoproteomics and functional analyses reveal sperm-specific protein changes downstream of kappa opioid receptor in human spermatozoa**

Itziar Urizar-Arenaza et al.

*Supplemental Figures:*

**Supplemental Figure S1:** KOR expression in human spermatozoa.

**Supplemental Figure S2.** Effect of U50488H on the human sperm proteome.

**Supplemental Figure S3.** Study of the acrosome reaction downstream KOR in human spermatozoa.

**Supplemental Figure S4.** Role of KOR in human sperm hyperactive motility at 60 minutes.

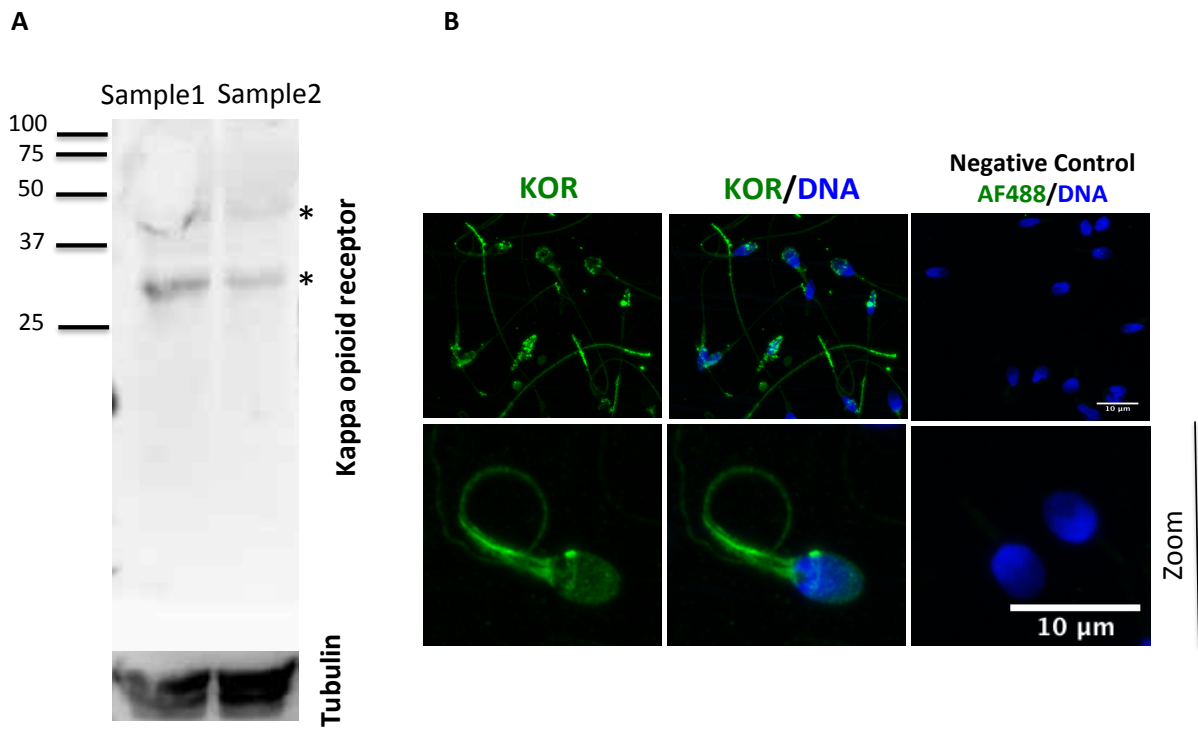

**Supplemental Figure S1. KOR expression in human spermatozoa (A)** by Western blotting showing immunoreactivity at around 45 and 35 kDa. \* indicate the different bands of KOR. (B) by immunofluorescence, in the sperm head, middle/postacrosomal region and tail. The nuclei are stained with Hoechst and are represented in blue (N=3). Scale bar 10  $\mu$ m.

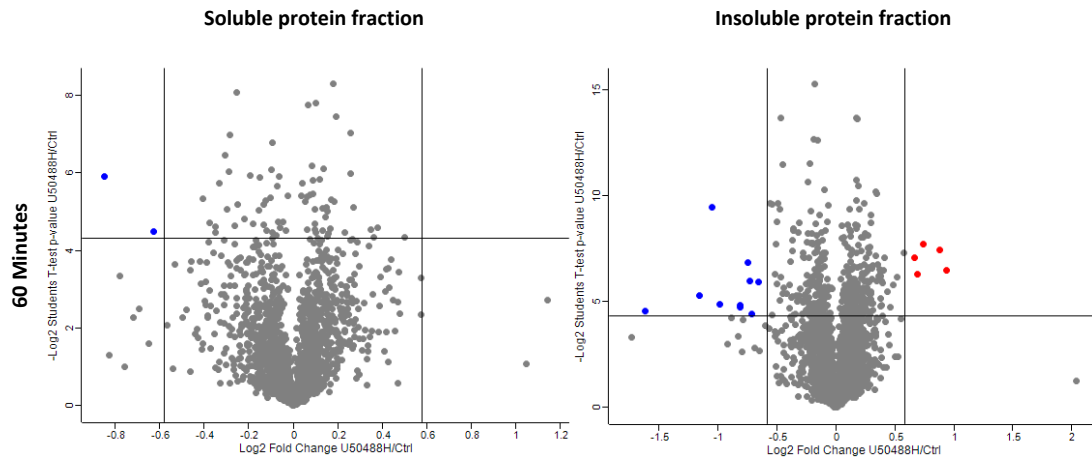

| 60 Minutes                        |                                                                                               |
|-----------------------------------|-----------------------------------------------------------------------------------------------|
| <b>Soluble protein fraction</b>   |                                                                                               |
| <b>Up-regulated proteins</b>      | ---                                                                                           |
| <b>Down-regulated proteins</b>    | KRT18      PPP6R3                                                                             |
| <b>Insoluble protein fraction</b> |                                                                                               |
| <b>Up-regulated proteins</b>      | GPRIN1<br>SEMA3F<br>IPO11<br>USP6NL<br>FGL2                                                   |
| <b>Down-regulated proteins</b>    | ENTPD3<br>C4orf17<br>DDX50<br>C5orf49<br>TTC37<br>ARL14EP<br>FBLN2<br>TBC1D1<br>SOGA1<br>HAX1 |

**Supplemental Figure S2. Effect of U50488H on the human sperm proteome. (A)** Overall  $\text{Log}_2$  U50488H/Control TMT fold change as a functional of  $-\text{Log}$  statistical significance of U50488H/Control ( $p$  value  $< 0.05$ ) of the soluble and insoluble protein fractions after 60 minutes U50488H treatment. In blue are indicated the down-regulated proteins by U50488H. In red are represented the U50488H-up-regulated proteins. Table containing the U50488H-regulated proteins following 60 minutes treatment in the soluble and insoluble protein fractions. U50488H/Ctrl  $> 1.5$  in red and U50488H/Ctrl  $< 0.67$  in blue.

**A**

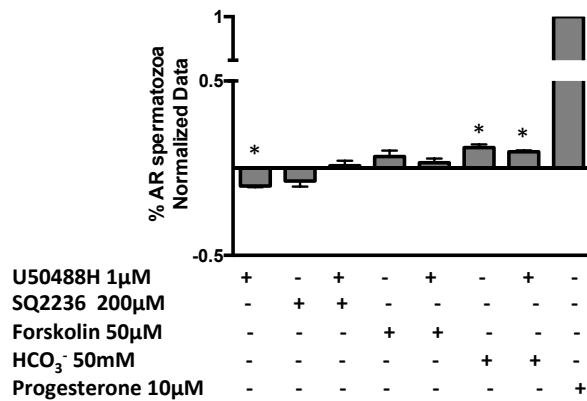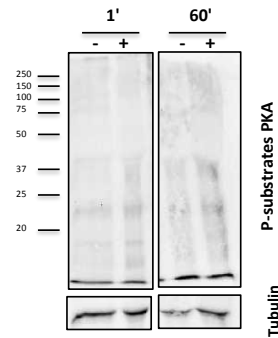

**B**

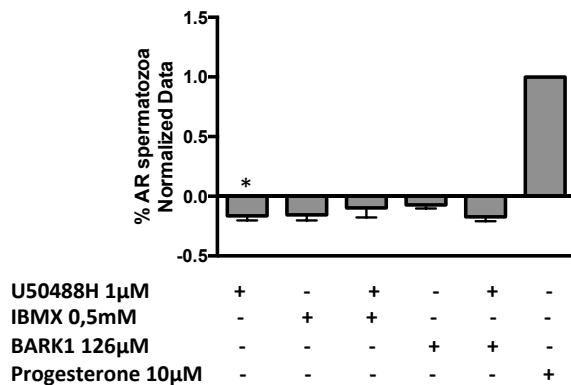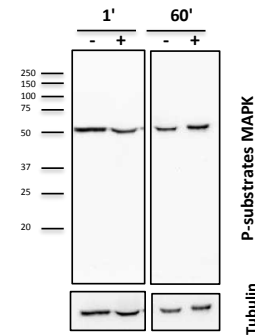

**Supplemental Figure S3. Study of the acrosome reaction downstream KOR in human spermatozoa.** **(A)** Study of the acrosome reaction by 60 minutes co-incubation of U50488H (1  $\mu$ M) and: SQ2236 (200  $\mu$ M), the tmAC inhibitor; Forskolin (50  $\mu$ M), the tmAC activator, and HCO<sub>3</sub><sup>-</sup>(50 mM), the SACY activator. X axis shows the different treatments used for this study and the Y axis represents the normalized data of the % of acrosome reacted spermatozoa. The normalization was performed using the untreated samples and the acrosome reacted samples. N=6. (\*p<0.05 vs Control). Immunoblotting assays showing the expression of the phosphorylated substrates of protein kinase A following 1 and 60 minutes U50488H treatment **(B)** Study of the acrosome reaction by 60 minutes co-incubation of U50488H (1  $\mu$ M) and: IBMX (0,5 mM), the phosphodiesterases inhibitor, and BARK1 (126  $\mu$ M), the GRK2 inhibitor. X axis shows the different treatments used for this study and the Y axis represents the normalized data of the % of acrosome reacted spermatozoa. The normalization was performed using the untreated samples and the acrosome reacted samples. (\*p<0.05 vs Control). N=6. Immunoblotting assays showing the expression of the phosphorylated substrates of MAP kinases following 1 and 60 minutes U50488H treatment. tmAC: Transmembrane Adenylate cyclase. SACY: soluble adenylate cyclase.

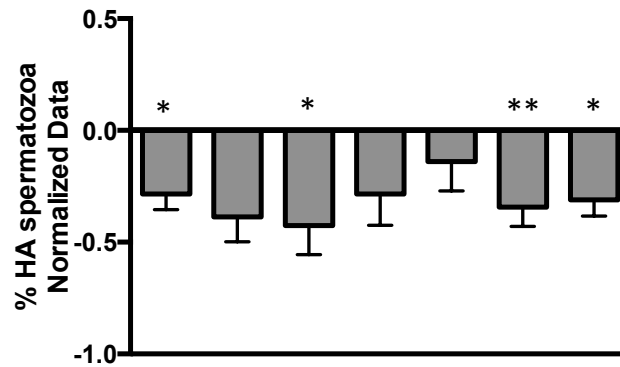

|                 |   |   |   |   |   |   |   |
|-----------------|---|---|---|---|---|---|---|
| U50488H 1μM     | + | - | + | - | + | - | + |
| Mibefradil 30μM | - | + | + | - | - | - | - |
| NNC55-0395 10μM | - | - | - | + | + | - | - |
| U73122 3μM      | - | - | - | - | - | + | + |

**Supplemental Figure S4. Role of KOR in human sperm hyperactive motility at 60 minutes.** Study of the hyperactive motility by 60 minutes co-incubation of U50488H (1 μM) and: NNC-55-0395 (10 μM), the Catsper inhibitor; Mibefradil (30 μM), a calcium channel activator, and U73122 (3 μM), the PLC inhibitor. X axis shows the different treatments used for this study and the Y axis represents the normalized data of the % of hyperactive spermatozoa. The normalization was performed using the untreated samples and the acrosome reacted samples. N=8. (\*p<0.05 and \*\*p<0.01 vs Control).
